# Supplementary material for: Marked difference in self-assembly, morphology, and cell viability of positional isomeric dipeptides generated by reversal of sequence
Source: Royal Society of Chemistry journal article supplement (doi:10.1039/c4sm02537g), 2015-01-01
Supplement: c4sm02537g1.pdf [file c4sm02537g1.pdf]

**Electronic Supplementary Information (ESI)**

**Marked Difference in Self-assembly, Morphology, and Cell Viability  
of Positional Isomeric Dipeptides Generated by Reversal of  
Sequence**

Sudeshna Kar and Yian Tai\*

*Department of Chemical Engineering, National Taiwan University of Science and  
Technology, 43 Keelung Road, Taipei 10607, Taiwan.*

\*Corresponding Author:

Prof. Yian Tai

Phone: +886-2-2737-6620, Fax: +886-2-2737-6644

E-mail: ytai@mail.ntust.edu.tw

## Table of Contents

|                                                                                                         |                 |
|---------------------------------------------------------------------------------------------------------|-----------------|
| Details of synthesis and characterization of peptides                                                   | Page S3-S6      |
| FE-SEM images of methanolic solutions of peptide <b>1</b> at different concentrations                   | Fig. <i>S1</i>  |
| Different types of microscopic analysis showing the formation of tubular structures of peptide <b>2</b> | Fig. <i>S2</i>  |
| Size distribution profile in DLS study of peptide <b>2</b>                                              | Fig. <i>S3</i>  |
| FE-SEM images of peptides <b>1</b> and <b>2</b> , obtained after thermal treatment                      | Fig. <i>S4</i>  |
| In case of peptide <b>1</b> formation of different nano-morphologies from different solvents            | Fig. <i>S5</i>  |
| Self-assembly pattern of peptide <b>1</b>                                                               | Fig. <i>S6</i>  |
| ORTEP diagram of peptide <b>2</b> backbone                                                              | Fig. <i>S7</i>  |
| Selected backbone torsion angles (°) for peptides <b>1</b> and <b>2</b>                                 | Table <i>S1</i> |
| Intermolecular hydrogen bonds parameters for peptides <b>1</b> and <b>2</b>                             | Table <i>S2</i> |
| Crystallographic refinement details for peptide <b>2</b>                                                | Table <i>S3</i> |
| X-ray crystallographic structure of peptide <b>2</b>                                                    | Fig. <i>S8</i>  |
| Schematic representation of formation of different nano-structures                                      | Fig. <i>S9</i>  |
| Solid state FT-IR spectral analysis of as synthesized peptide <b>2</b> and its tubular form             | Table <i>S4</i> |

## **Detail synthesis of Boc-Aib-*m*ABA-OMe (Peptide 2)**

### **Synthesis of Boc-Aib-OH**

The amino acid  $\alpha$ -aminoisobutyric acid (5 g, 48.54 mmol) was suspended in a 1:1 tetrahydrofuran (THF) water mixture. Solid  $\text{NaHCO}_3$  (12.23 g, 145.62 mmol) was added and Boc-anhydride (11.63 mL, 53.39 mmol) was added to it. The reaction mixture was stirred at room temperature over night. After 24 h, the THF layer should be driven out with the help of vacuum pump. The aqueous layer was cooled in an icebath, acidified with 2M HCl and extracted with ethylacetate. The organic layer was washed with excess of water and dried over anhydrous  $\text{Na}_2\text{SO}_4$  and evaporated in *vacuo* producing a white solid. Yield: 8.0 g (81.21%).

### **Synthesis of the peptide Boc-Aib-*m*ABA-OMe (Peptide 2)**

Boc-Aib-OH (0.65 g, 3.25 mmol) was dissolved in dimethylformamide (DMF; 10 mL). *m*-ABA-OMe (1.40 g, 6.5 mmol) obtained from its hydrochloride was added followed by DC DCC (0.97 g, 4.87 mmol) and HOBT (0.42 g, 3.25 mmol). The reaction mixture was stirred at room temperature for 1 day. The precipitated dicyclohexylurea (DCU) was filtered and diluted with ethyl acetate (80 mL). The organic layer was washed with excess of water, 1M HCl (3 X 30 mL), 1M  $\text{Na}_2\text{CO}_3$  solution (3 X 30 mL) and again with water. The solvent was then dried over anhydrous  $\text{Na}_2\text{SO}_4$  and evaporated in *vacuo*, giving a light yellow gum. Purification was done using silica gel as stationary phase and an ethyl acetate-petroleum ether mixture as the eluent. Yield: 0.95 g (88.78%). M.p = 138°C.

## Single Crystal X-Ray Diffraction

Diffraction data for peptide **2** grown by slow evaporation of methanol was collected with MoK $\alpha$  radiation at 100 K using the Bruker SMART CCD diffractometer System. Data analyses were carried out with the Bruker SAINT program. The structures were solved using direct methods with the SHELXL-2013 program (Sheldrick, 2013). For peptide **1** and **2** the structures were refined on  $F^2$  using SHELXL-2013 (Sheldrick, 2013) to  $R1=0.039$ ;  $wR2 =0.103$  for 4367 reflections with  $I > 2\sigma(I)$  for peptide **1** (*Chem. Commun.*, **2014**, *50*, 2638-2641), and to  $R1=0.052$ ;  $wR2 =0.097$  for 2530 reflections with  $I > 2\sigma(I)$  for peptide **2**, respectively. Crystallographic details of peptide **1** and **2** have been deposited at the Cambridge Crystallographic Data Centre; reference CCDC no of peptide **1** is 949965 (*Chem. Commun.*, **2014**, *50*, 2638-2641) and that of peptide **2** is 992075. These data can be obtained free of charge via [www.ccdc.cam.ac.uk/conts/retrieving.html](http://www.ccdc.cam.ac.uk/conts/retrieving.html) (or from the Cambridge Crystallographic Data Centre, 12 Union Road, Cambridge CB21EZ, UK; fax: (+44) 1223-336-033; or e-mail: [deposit@ccdc.cam.ac.uk](mailto:deposit@ccdc.cam.ac.uk)).

## Detail characterization of Boc-Aib-*m*ABA-OMe (Peptide 2)

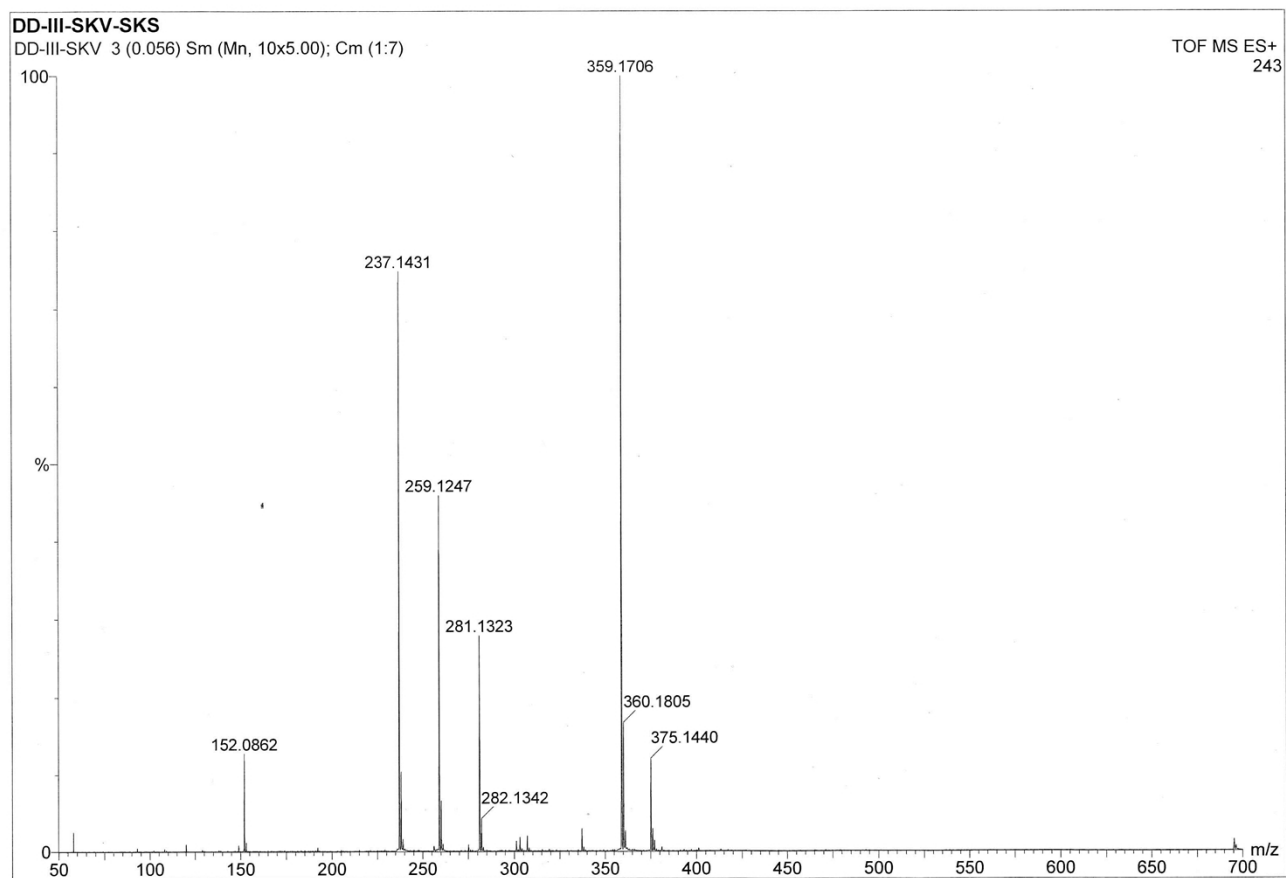

Mass spectrum of peptide 2

### Boc-Aib-*m*-ABA-OMe

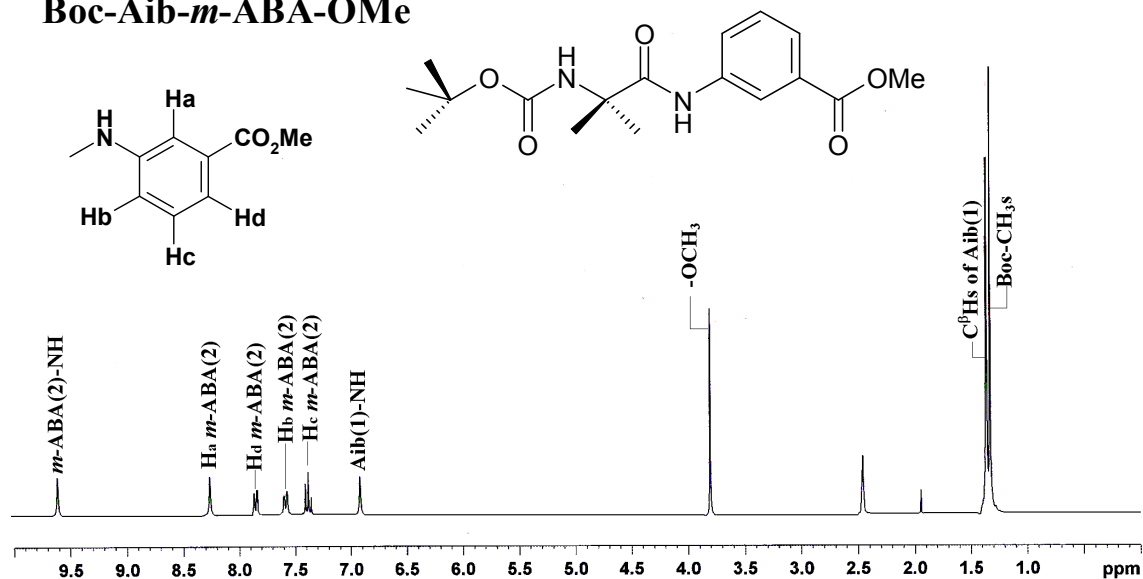

<sup>1</sup>H NMR spectrum of peptide **2** in DMSO-D<sub>6</sub> (300 MHz)

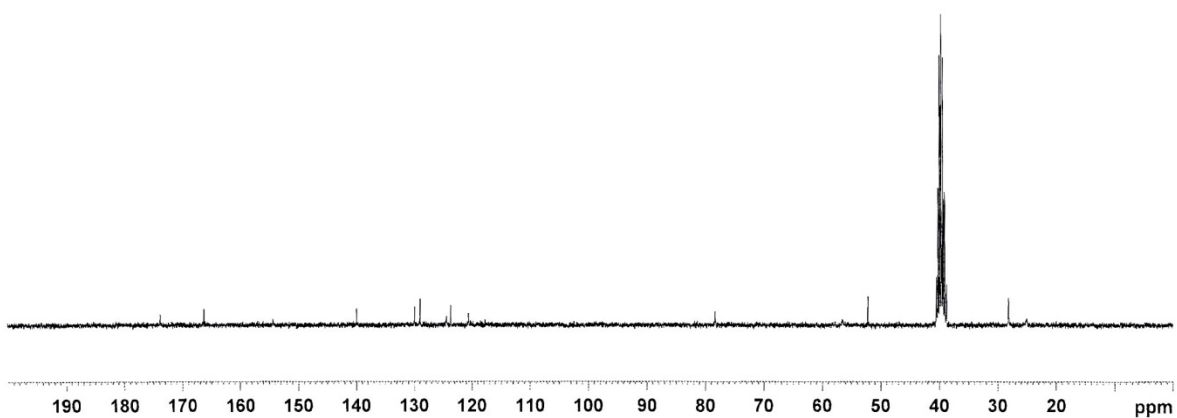

<sup>13</sup>C NMR spectrum of peptide **2** in DMSO-D<sub>6</sub> (75MHz)

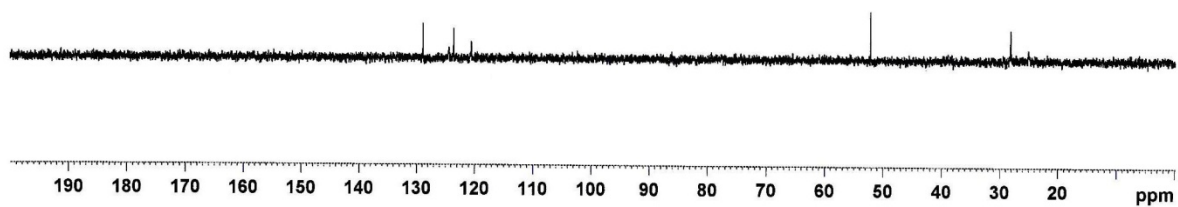

DEPT-135 spectrum of peptide **2** in DMSO-D<sub>6</sub> (75MHz)

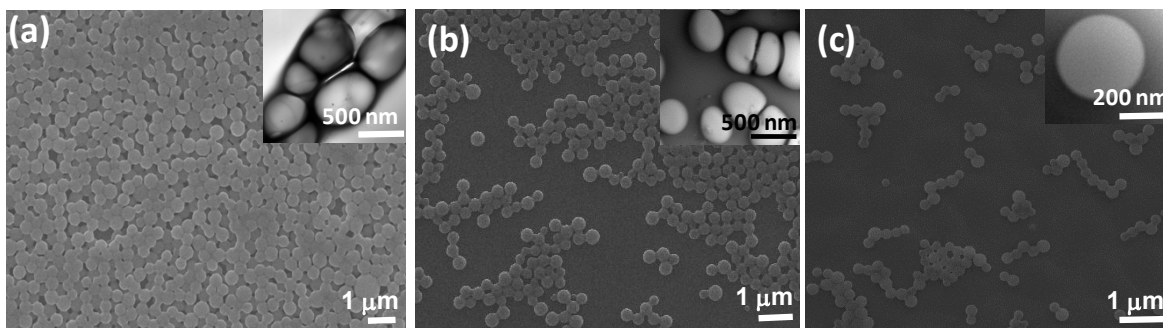

**Fig. S1** FE-SEM images of methanolic solutions of peptide at concentrations of: (a) 10 mM; (b) 5 mM, arrows indicate the fused spherical structures and (c) 1 mM solutions. In the insets of (a), (b) and (c) the TEM images show the hollow nature of the spherical structures

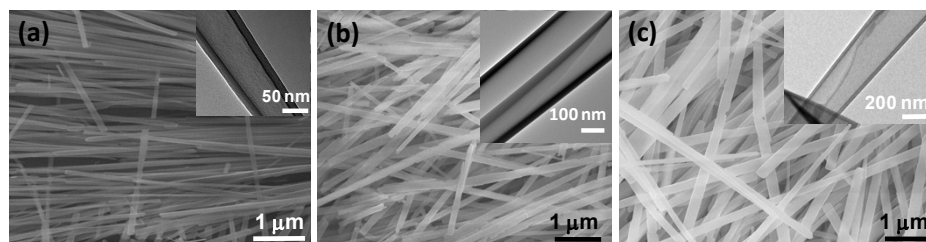

**Fig. S2** Different types of microscopic analysis showing the formation of tubular structures self-assembled from methanolic solutions. SEM images of peptide at concentrations of: (a) 1 mM, (b) 5 mM, and (c) 10 mM solutions. In the insets of (a), (b) and (c) the TEM images show the hollow nature of the nanotubes

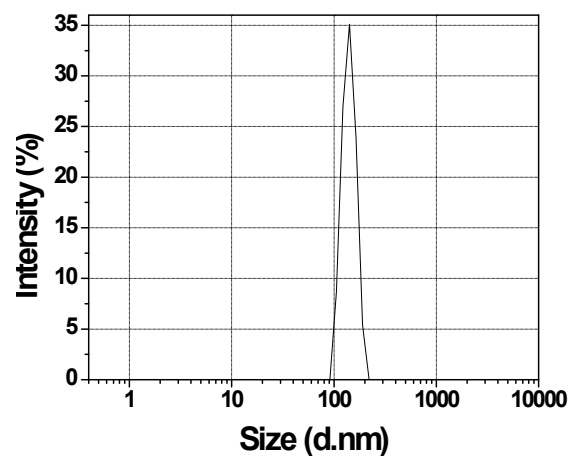

**Fig. S3** Size distribution profile in DLS study of peptide **2** showing hydrodynamic diameter, 122.58 nm, with polydispersity index, 1.00

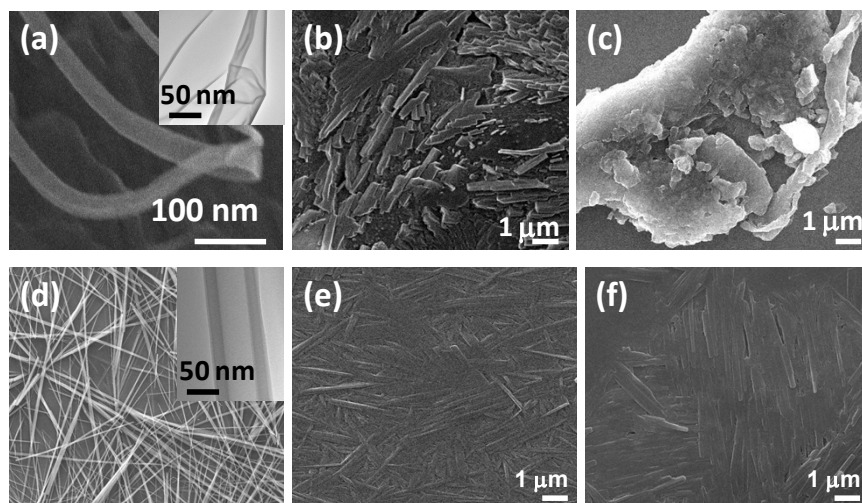

**Fig. S4** FE-SEM images of peptides **1** and **2**, obtained after thermal treatment for 1hr in a convection oven at a constant temperature of 50°C [(a) peptide **1** and (d) peptide **2**], 170°C [(b) peptide **1** and (e) peptide **2**] and 200°C [(c) peptide **1** and (f) peptide **2**]



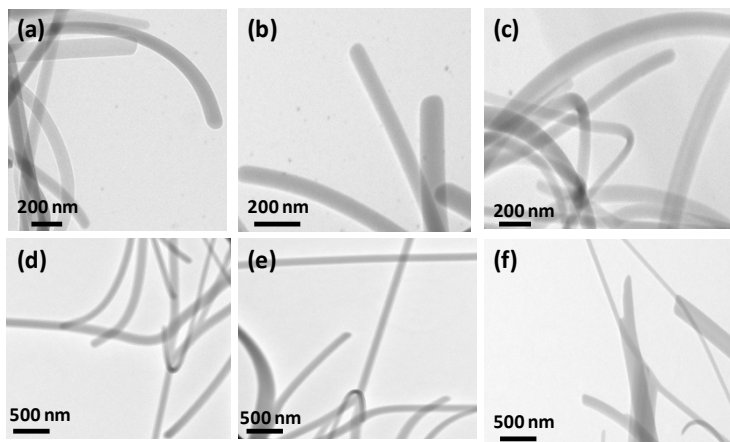

**Fig. S5** TEM images of peptide **2** forming nano tubes from (a) chloroform-methanol (1:1 v/v), (b) toluene, (c) from ethyl-acetate, (d) CHCl<sub>3</sub>-Petroleum ether (1:1 v/v), (e) acetone and (f) dimethylformamide solvent.

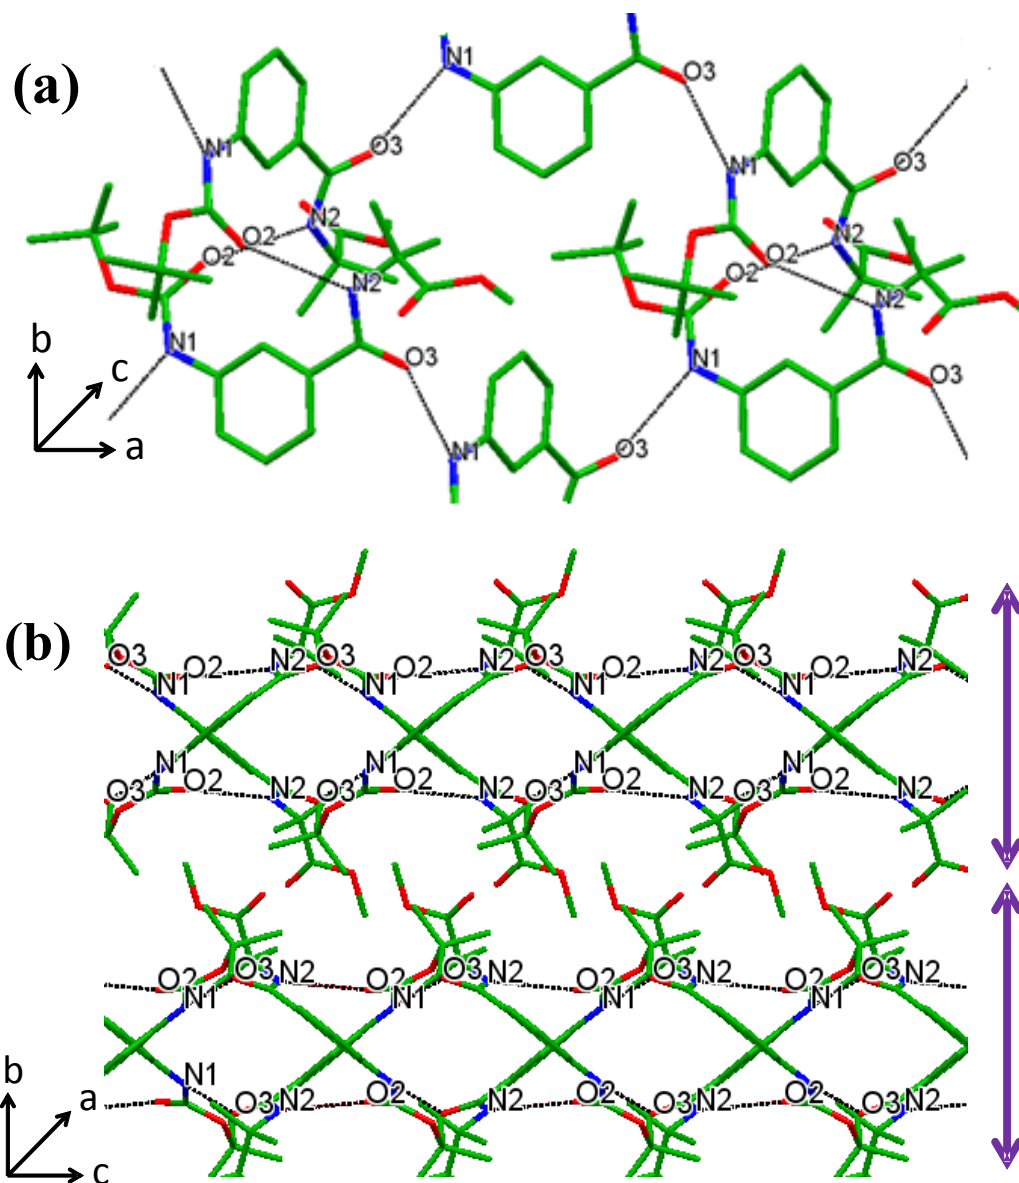

**Fig. S6** X-ray crystallographic structure of peptide 1; (a) peptide molecules self-assemble to form  $\beta$ -sheet like structure in  $ab$  plane; (b)  $\beta$ -sheet like structures are stacking layer by layer in  $bc$  plane (Taken from Chem. Commun. 2014, 50, 2638-2641)

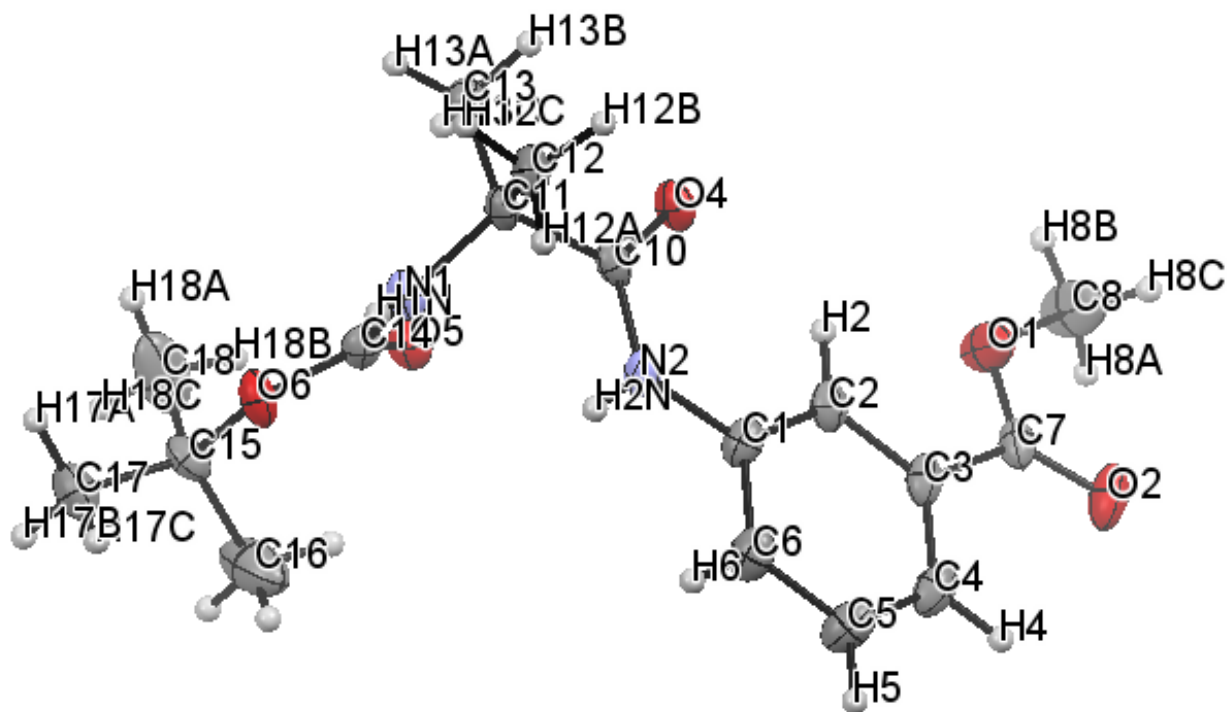

Fig. S7 ORTEP diagram of peptide 2. Percentage probability of the ellipsoids is 50 %

**Table S1** Selected backbone torsion angles ( $^{\circ}$ ) for peptides **1** and **2**

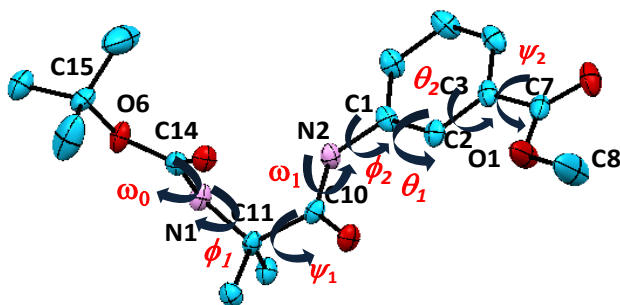

Selected backbone torsion angles ( $^{\circ}$ ) for peptide **2**

---

|                              |           |                            |           |
|------------------------------|-----------|----------------------------|-----------|
| N1-C14-O6-C15                | 178.2(3)  | C2-C1-N2-C10 ( $\phi_2$ )  | -2.4(6)   |
| C11-N1-C14-O6 ( $\omega_0$ ) | -164.3(3) | C3-C2-C1-N2 ( $\theta_1$ ) | -179.9(4) |
| C10-C11-N1-C14 ( $\phi_1$ )  | -61.2(4)  | C7-C3-C2-C1 ( $\theta_2$ ) | 178.9(3)  |
| N2-C10-C11-N1 ( $\psi_1$ )   | -42.2(4)  | O1-C7-C3-C2 ( $\psi_2$ )   | -10.3(5)  |
| C1-N2-C10-C11 ( $\omega_1$ ) | 176.2(3)  |                            |           |

---

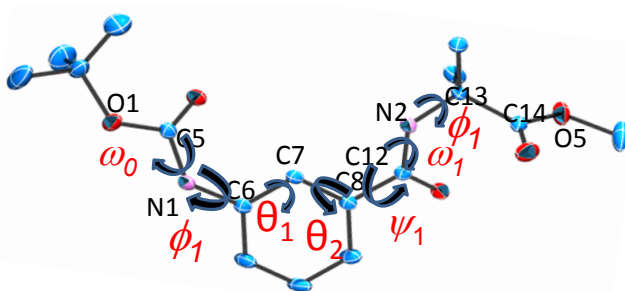

Selected backbone torsion angles ( $^{\circ}$ ) for peptide**1** (Taken from Chem. Commun. 2014, 50, 2638-2641)

---

|                             |             |                              |            |
|-----------------------------|-------------|------------------------------|------------|
| N1-C5-O1-C4                 | -179.25(10) | N2-C12-C8-C7 ( $\psi_1$ )    | 22.87(13)  |
| C6-N1-C5-O1 ( $\omega_0$ )  | -177.19(9)  | C13-N2-C12-C8 ( $\omega_1$ ) | -178.94(8) |
| C7-C6-N1-C5 ( $\phi_1$ )    | 24.31(15)   | C14-C13-N2-C12 ( $\phi_2$ )  | -55.80(11) |
| C8-C7-C6-N1 ( $\theta_1$ )  | 177.31(8)   | O5-C14-C13-N2 ( $\psi_2$ )   | 145.55(8)  |
| C12-C8-C7-C6 ( $\theta_2$ ) | 177.78(8)   |                              |            |

---

**Table S2** Intermolecular hydrogen bonds parameters for peptides **1** and **2**

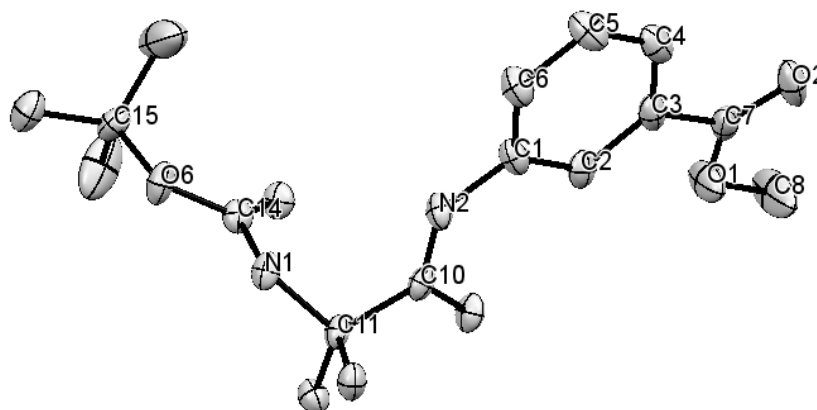

**Peptide 2**

| Type                                                                          | N...O/(Å) | H...O/(Å) | O...H-N/(°) |
|-------------------------------------------------------------------------------|-----------|-----------|-------------|
| N(1)-H(1)...O(5) <sup>a</sup>                                                 | 2.915(4)  | 2.06(4)   | 164(3)      |
| N(2)-H(2)...O(4) <sup>a</sup>                                                 | 2.846(5)  | 2.13(4)   | 143(3)      |
| Symmetry elements: <sup>a</sup> 1.5-x, y, 1/2+z, <sup>b</sup> 1.5-x, y, 1/2+z |           |           |             |

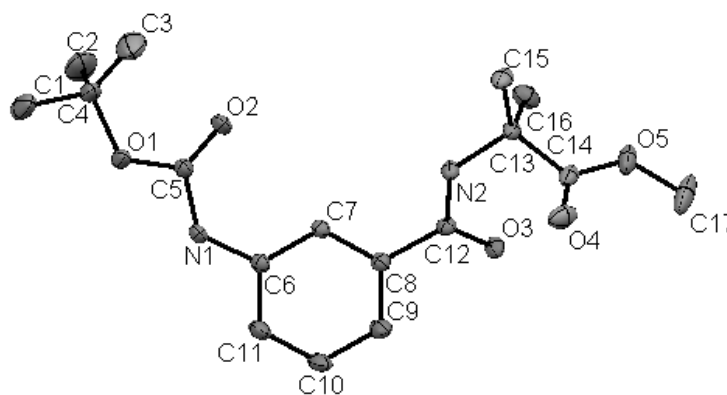

**Peptide 1**

| Type                                                                              | N...O/(Å) | H...O/(Å) | O...H-N/(°) |
|-----------------------------------------------------------------------------------|-----------|-----------|-------------|
| N(2)-H(2)...O(2) <sup>a</sup>                                                     | 2.943(1)  | 2.08(2)   | 176(1)      |
| N(1)-H(1)...O(3) <sup>b</sup>                                                     | 2.934(1)  | 2.10(2)   | 160(1)      |
| Symmetry elements: <sup>a</sup> -x, y, -z+1/2; <sup>b</sup> -x+1/2, y-1/2, -z+1/2 |           |           |             |

**Table S3** Crystallographic refinement details for peptide 2

| Crystallographic refinement details           | Peptide 2                                                     |
|-----------------------------------------------|---------------------------------------------------------------|
| Crystal Colour                                | Colourless                                                    |
| <i>Chemical Formula</i>                       | C <sub>17</sub> H <sub>24</sub> N <sub>2</sub> O <sub>5</sub> |
| Formula Weight (g)                            | 336.37                                                        |
| Crystal System                                | orthorhombic                                                  |
| Space group                                   | P c a 2 <sub>1</sub>                                          |
| Z                                             | 4                                                             |
| a (Å)                                         | 16.161(2)                                                     |
| b (Å)                                         | 12.5161(16)                                                   |
| c (Å)                                         | 9.3110(12)                                                    |
| α(°)                                          | 90.00                                                         |
| β(°)                                          | 90.00                                                         |
| γ(°)                                          | 90.00                                                         |
| V (Å <sup>3</sup> )                           | 1883.3(4)                                                     |
| density (gcm <sup>-3</sup> )                  | 1.186                                                         |
| Temperature (K)                               | 100                                                           |
| Unique reflections                            | 3973                                                          |
| reflections I>2σ(I)                           | 2530                                                          |
| N <sup>o</sup> Parameters                     | 228                                                           |
| GoF                                           | 0.977                                                         |
| R <sub>1</sub> [I>2σ(I)], all                 | 0.0526, 0.1044                                                |
| wR <sub>2</sub> [I>2σ(I)], all                | 0.0985, 0.1172                                                |
| residual electron density (e/Å <sup>3</sup> ) | 0.264 and -0.232                                              |

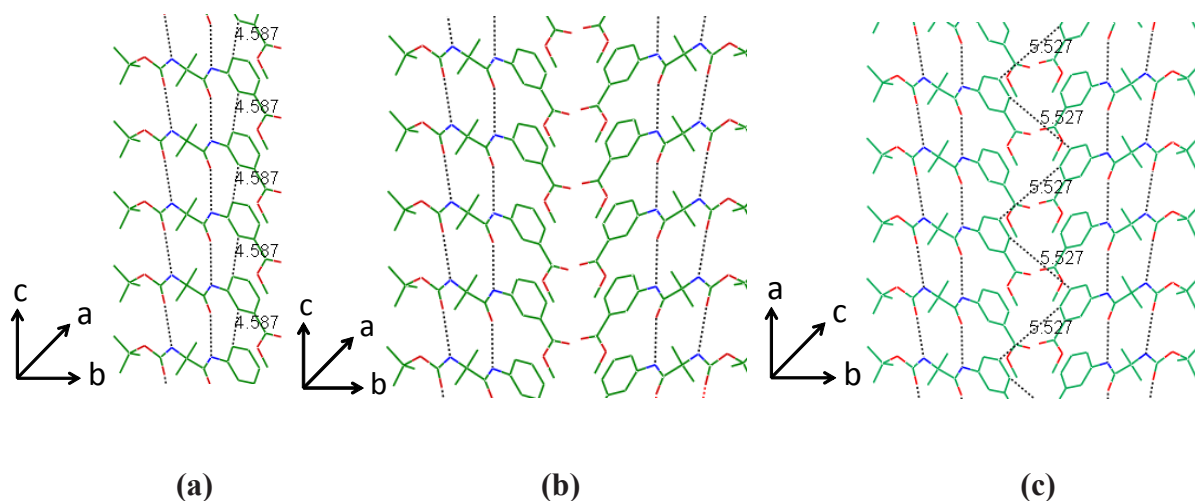

**Fig. S8** X-ray crystallographic structure of peptide **2**; (a) peptide molecules self-assemble in *bc* plane to form a  $\beta$ -sheet structure. The closest  $\pi$ -stacking distance between two aromatic rings is 4.587 Å (b) Peptide molecules again self-assemble in *ab* plane to form another zipper like structure; and (c) the closest  $\pi$ -stacking distance between two diagonally situated aromatic rings is 5.527 Å

In case of peptide **1** the formation of nanovesicles by peptide **1** may be envisaged by considering the wrapping of the  $\beta$ -sheet-like layers in two different directions simultaneously (Fig. S9). We assumed in our previous study, that thermal treatment or interaction with  $-\text{CH}_3$  functional group on different SAM surfaces or in presence of different solvents, like acetone, ethyl acetate, DMF and chloroform-petroleum ether (1:1 v/v), the two-ways wrapping of  $\beta$ -sheet layers opens up and they are arranged side by side to form the fibrils/ribbons (Fig. S9). Again in chloroform-methanol solvent mixture (1:1 v/v) and aromatic solvent like toluene  $\beta$ -sheet-like layers may fold in only one direction to form the nano-tubes (Fig. S9). But under all the variable conditions peptide **2** maintains the one way wrapping of the sheet-like structures.

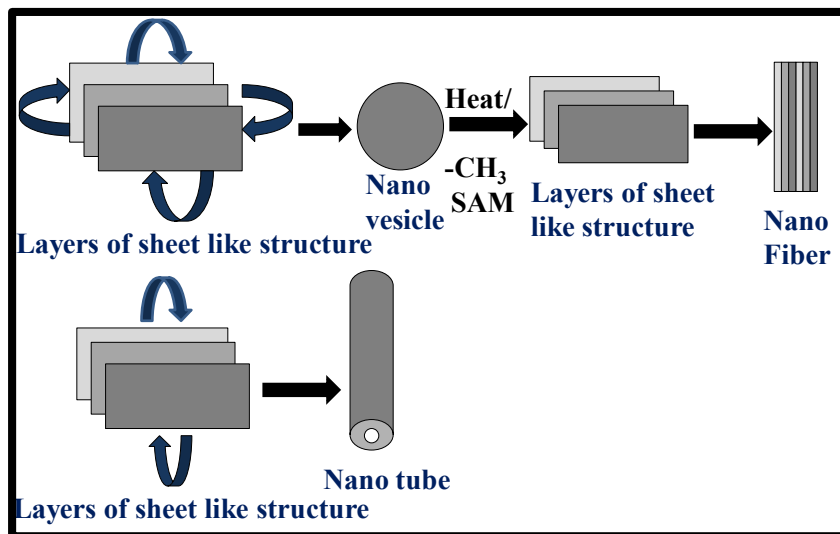

**Fig. S9** Schematic representation of formation of different nano-structures



**Table S4** Solid state FT-IR spectral analysis of as synthesized peptide **2** and its tubular form

|                                      | N–H stretching vibration & overtone of the N–H bending vibration (cm <sup>-1</sup> ) | C=O stretching vibration in ester group (cm <sup>-1</sup> ) | C=O stretching vibrations of the peptide urethane, amide I, and bending peaks of amide II (cm <sup>-1</sup> ) |
|--------------------------------------|--------------------------------------------------------------------------------------|-------------------------------------------------------------|---------------------------------------------------------------------------------------------------------------|
| As-synthesized peptide               | 3319.54, 3210.78                                                                     | 1724.44                                                     | 1679.82, 1594.81, 1549.03, 1523.79                                                                            |
| Tube formation from methanol solvent | 3324.88, 3211.46                                                                     | 1724.29                                                     | 1684.81, 1595.23, 1552.57, 1524.63                                                                            |
